# Supplementary material for: Identification of novel myelodysplastic syndromes prognostic subgroups by integration of inflammation, cell-type composition, and immune signatures in the bone marrow
Source: eLife. 2024 Sep 5;13:RP97096. doi: 10.7554/eLife.97096 (PMC11377035; doi:10.7554/eLife.97096)
Supplement: Supplementary file 1. [file elife-97096-supp1.xlsx]

## Sheet: S1
Study ID	Number of Samples	Cell Type	Mean Age	Clinical Data	Genotype Data	Transcriptome Data	Survival Data
EGAD00001003891	94	BMMNC	65.9	Yes	Yes	Yes (RNA-seq)	OS,EFS
GSE114922	83	BM CD34+	66	Yes	Yes	Yes (RNA-seq)	OS
