# Supplementary material for: Identification of novel myelodysplastic syndromes prognostic subgroups by integration of inflammation, cell-type composition, and immune signatures in the bone marrow
Source: eLife. 2024 Sep 5;13:RP97096. doi: 10.7554/eLife.97096 (PMC11377035; doi:10.7554/eLife.97096)
Supplement: Supplementary file 2. [file elife-97096-supp2.xlsx]

## Sheet: S2
EGAD00001003891 (BMMNC cohort)			GSE114922 (CD34+ chort)
Mutated gene	Occurrence (n)		Mutated gene	Occurrence (n)
ASXL1	21		SF3B1	28
CBL	8		SRSF2	8
CUX1	9		U2AF1	6
DNMT3A	7
EZH2	6
IDH1	5
JAK2	5
RUNX1	7
SF3B1	36
SRSF2	17
STAG2	5
TET2	21
U2AF1	9
4q	5
5q	6
7/7q	5
chr8	5
