# Supplementary material for: Identification of novel myelodysplastic syndromes prognostic subgroups by integration of inflammation, cell-type composition, and immune signatures in the bone marrow
Source: eLife. 2024 Sep 5;13:RP97096. doi: 10.7554/eLife.97096 (PMC11377035; doi:10.7554/eLife.97096)
Supplement: Supplementary file 3. [file elife-97096-supp3.xlsx]

## Sheet: S3
Cell-type composition										Immunology
Galen et al., 2018										Danaher et al., 2017 & 2018																																Gueguen et al., 2021			Zemmour et al., 2018	Pace et al., 2018			Miller et al., 2019
HSC-like	Progenitor-like	GMP-like	Promono-like	Monocyte-like	cDC-like	HSC/Prog	GMP	Myeloid	Myeloid-like	B cells	CD45	CD8+ T cells	Cytotoxic cells	DCs	Endothelial cells	Exhausted CD8+ T cells	Macrophages	Mast cells	Neutrophils	CD56dim NK cells	NK cells	T cells	Th1 cells	Treg	APM	APM loss	Apoptosis	Cytotoxicity	Glycolytic activity	Hypoxia	Immunoproteasome	Inflammatory chemokines	JAK-STAT loss	Lymphoid cells	MAGEs	MHC2	Myeloid cells	Proliferation	Stroma	TIS	Single-gene signatures	Negative ICP (manually curated)	Positive ICP (manually curated)	Tfh	Tregs	Effectors	Central memory	Stemness	Exhausted progenitors
NPTX2	CDK6	PRTN3	DEFB1	FCN1	MRC1	SPINK2	CPA3	VCAN	LYZ	BLK	PTPRC	CD8A	CTSW	CCL13	FAM124B	CD244	CD163	MS4A2	CSF3R	IL21R	NCR1	CD3D	TBX21	FOXP3	B2M	B2M	AXIN1	GZMA	AKT1	BNIP3L	PSMB8	CCL2	JAK1	CXCL10	MAGEA3/A6	HLA-DRB5	C5AR1	ANLN	FAP	CCL5	ARG1	CD96	CD226	PDCD1	IL2RA	S1PR5	NR1D2	ABCB1A	XCL1
H1F0	HSP90AB1	MPO	RNASE2	S100A12	HLA-DRB5	ZFAS1	PRSS57	S100A9	S100A9	CD19		CD8B	GNLY	CD209	KDR	EOMES	CD68	CPA3	S100A12	KIR2DL3	XCL1/2	CD3E			TAP1	TAP1	BAD	GZMB	HIF1A	MXI1	PSMB9	CCL3/L1	JAK2	CXCR3	MAGEA1	HLA-DPA1	CCL3/L1	CCNB1	ADAM12	CD27	CD274	CTLA4	CD80	CXCR5	IL2RB	KLRK1	HESX1	KAT6A	MS4A4C
EMP1	SPINK2	CALR	MS4A3	MAFB	CST3	NRIP1	ELANE	S100A8	S100A8	MS4A1			GZMA	HSD11B1	CLEC14A	LAG3	CD84	HDC	CEACAM3	KIR3DL1		CD3G			TAP2	TAP2	BAX	GZMH	SLC2A1	ADM	PSMB10	CCL4	IFNGR1	CX3CL1	MAGEA12	HLA-DPB1	CD14	CDC20	COL6A3	CD274	CD276	ENTPD1	CD86	ICOS	IKZF2	CD244	CXCR4	RRAS	ID3
MEIS1	EEF1B2	CLEC5A	SERPINB10	VCAN	SAMHD1	GAS5	SUCNR1	MNDA	VCAN	TNFRSF17			GZMB		CXorf36	PTGER4	MS4A4A	TPSAB1/B2	FCAR	KIR3DL2		CD6			TAPBP	TAPBP	BBC3	PRF1	HK2	PLOD2		CCL7	IRF1	PRF1	MAGEA4	HLA-DQB1	CD47	CENPF	LRRC32	CD276	CTLA4	HAVCR2	ICOS	BTLA	CTLA4	GZMA	KLF2	ABCB1B	CXCL10
CALCRL	PCNP	ELANE	SESN3	S100A9	NAPSB	JUN	CALR	FCN1	MNDA	FCRL2			GZMH		ROBO4				FCGR3A/B			SH2D1A			HLA-A	HLA-A	BCL2L1	GNLY	TPI1	P4HA1		CCL8	IFNGR2	GZMK	MAGEB2	HLA-DRA	CEBPB	CEP55	OLFML2B	CD8A	IDO1	IDO1	ICOSLG	SAP	CAPG	ANXA1	SLC11A2	KLF4	SLAMF6
TPSD1	TAPT1-AS1	POU4F1	ZFR	PLBD1	FCER1A	MEIS1	PRTN3	LYZ	CSTA	FAM30A			KLRB1		MYCT1				FPR1			TRAT1			HLA-B	HLA-B			ENO1	ALDOC				GZMB	MAGEC2	HLA-DRB1	CLEC4E	EXO1	PDGFRB	CMKLR1	IL10	LAG3	TNFRSF18	CD200	TNFRSF4	CX3CR1	PLEKHA5	SALL4	TCF7
TPT1	HINT1	TRH	MRPL33	SERPINA1	HLA-DRB1	HLF	AZU1	THBS1	SRGN	PNOC			KLRD1		CDH5				SIGLEC5						HLA-C	HLA-C			LDHA	SLC2A1				CD27	MAGEC1	HLA-DMA	CLEC5A	KIF2C		CXCL9	NOS2	LGALS9	TNFRSF4	CXCL13	TNFRSF18	KLRG1	KAT6A	ALPL	IL7R
CRHBP	LRRC75A-AS1	TSPOAP1	CTSG	BCL2A1	JAML	EGR1	CST7	CSTA	FCN1	SPIB			KLRK1		TIE1														PFKFB3	PDK1				IL2RG		HLA-DOA	CLEC7A	MELK		CXCR6	PDCD1	PDCD1	TNFRSF9	IL21	IZUMO1R	ZEB2	REST	LDHA	TNFSF8
CLNK	DSE	CEBPE	SLC44A1	THBS1	PKIB	CRHBP	NUCB2	SAMSN1	FTL	TCL1A			PRF1		BCL6B														PFKM	P4HA2				KLRK1			CSF1	MKI67		HLA-DQA1	PDCD1LG2	CD274	TNFSF18	IL4	CHCHD10	CCL9	JARID2	SATB1	CTLA2A
TSC22D1	PEBP1	LINC01835	SLPI	PSAP	HLA-DRA	NPR3	CTSG	FGL2	MS4A6A				NKG7		PALMD														GOT1	BNIP3				CTLA4			CSF1R	RRM2		HLA-DRB1	TGFB1	PDCD1LG2	TNFSF4	CMAF	GPR83	KLRC1	PRKCE	ANTXR2	RPS20
DST	LOC107984974	NUCB2	FUT4	S100A8	HLA-DRB6	FAM30A	EREG	TYROBP	PSAP						MMRN2														GOT2					GZMH			CSF3R	UBE2C		HLA-E	TIGIT	PVR	TNFSF9	BCL6	FOXP3	IL1RL1	TIGIT	LDHB	LTB
NRIP1	H2AFY	CSF3R	SRGN	FPR1	CPVL	MMRN1	IGFBP2	IFI30	IFI30																				GLUD1					CD3D			CYBB			IDO1		PVRIG	CD70	BLIMP1		KLRA9	TNFSF8	SETBP1	CD9
ABCB1	EEF1A1	RUNX1T1	CD70	C5AR1	HLA-DPB1	MSI2	TRH	PLBD1	ANXA2																				HK1					KLRB1			DAB2			LAG3		TIGIT	CD40	ASCL2		LXN	SELL	ARL4C	RPL36A
GABRA4	SMIM24	CD38	PRLR	CD14	HLA-DQA1	ANGPT1	FAM46A	S100A12	FGL2																									KLRD1			FCAR			NKG7		CD276	NECTIN2			ITGB2	CCR7	LDHC	SOCS3
ZBTB20	PSME1	PLPPR3	PLD3	NAMPT	HLA-DPA1	EIF4A2	SERPINB1	ANXA2	S100A10																									LCK			FCGR1A			PDCD1LG2		VTCN1	CD48			SNX10	CNR2	SETDB1	RPL35
ABCA9	SOX4	IGFBP2	LPL	VNN2	CLEC4A	TPT1	C1QTNF4	S100A10	LGALS3																									CD5			FCN1			PSMB10		VSIR	CD244			LAG3	EVL	ATR	RPS2
TPSB2	LINC01623	PRRT4	RETN	CTSS	TMSB10	COMMD6	VAT1	PSAP	CTSS																									IRF4			FPR1			STAT1		CD200	CD40LG			S100A4	IL7R	LDHD	RPS19
KMT2A	EEF1G	SNHG5	TP53INP2	DUSP1	CAP1	EEF1A1	CEACAM6	FCER1G	ANXA1																									CD8A			FPR3			TIGIT		CD200R1	CD27			ISG20	MCOLN2	SKIL	JUN
FAM30A	EBPL	FABP5	HSPA5	CEBPB	HLA-DQB1	SNORD13	CAT	SAMHD1	ANXA5																									CD38			HCK					BTLA	TMIGD2			TBX21	EOMES	BAALC	RPS17
MEF2C	EIF4B	LOC100419170	RNASE3	CR1	CRIP1	FAU	TSPOAP1	LGALS1	AIF1																									EOMES			IL1B						CD28			RORA	MYC	LECT1	GPR183
TMEM74	PARP1	CLEC11A	CCL23	NFKBIA	CLEC10A	FOS	SNHG25	COTL1	NCF2																									GZMM			ITGAM									PRF1	PIM2	SMARCAD1	RPLP0
PDZRN4	MEST	SERPINB1	EMB	SLC11A1	GPX1	PHLDB2	MPO	CTSH	LYST																									GNLY			ITGAX									LYN	POU6F1	BASP1	RPL13
ST3GAL1	TMEM70	AZU1	ATP8B4	LILRB3	ITGB7	MSRB3	CLEC11A	CTSS	FCER1G																									IFITM1			LILRA5									IFNG	FAS	LPIN1	TRAF1
XIRP2	TFDP2	FBN2	CLU	BCL6	HLA-DQB2	GUCY1A3	SLC2A5	S100A6	CD68																									IDO1			LILRB2									ID2	SATB1	SOX2	RPL31
RBPMS	ATP5G2	HNRNPDL	FAM107B	CYP1B1	DBI	C6orf48	PRRT4	ITGB2	TNFSF13B																									MS4A1			LYZ									IFITM3	RGS10	BCL6	ITGB1
TMEM25	NAP1L1	HSPB1	KBTBD11	TNFAIP2	FTH1P3	GBP4	ERLIN1	FPR1	VIM																									GZMA			MARCO									S100A10	DOCK9	LY6A	MT-CYTB
C20orf203	MSI2	RNA5-8S	CSTA	MS4A10	ACTB	PCDH9	PCOLCE2	MEGF9	IRS2																									CD2			MRC1									CCR2	RNF138	SPON1	RPS18
GNG11	TPM4	THSD7A	ANKRD28	AQP9	HLA-DQA2	SNHG6	NCOA4	CD14	GRN																									CD3E			NFAM1									PERP	IER3	BUB1	RPL10-PS3
SLC6A13	SPN	C12orf57	PIWIL4	TLR4	S100B	RACK1	CD38	MS4A6A	TNFAIP2																									CD3G			NLRP3									NRP1	PARP8	LY6E	RPL12
HOPX	SELL	FGFR1	RNVU1-6	APOBEC3A	ALDH2	ADGRG6	SPARC	FTL	MCL1																									CD40LG			OLR1									S100A6	CD27	STAT3	GM8730
																																		CD6			P2RY13									ITGAX	CD7	CCR7	RPS28
																																		CD7			S100A8									SQLE	TCF7	MAP3K8	EMB
																																		CD79A			S100A9									ITGA4	TRAF1	TBX21	RPL21
																																		CD8B			SERPINA1									LSP1	STAT3	CCR9	RPS29
																																		CXCL11			SIRPA									ADAM8	SKIL	MAPK12	RPS26
																																		CXCL13			SIRPB2									S100A8	CXCR5	TBX3	RPSA
																																		CXCL9			SLC11A1									BHLHE40	JUN	CD27	RPS7
																																		HLA-DOB			TLR1									PDCD1	TRAF4	MCM3AP	GM10073
																																		IFNG			TLR2									ANXA2	ANTXR2	TCF3	MT-CO3
																																		LAG3			TLR4									BATF3	P2RY14	DOCK9
																																		LY9			TLR8									BRCA1	BASP1	MCOLN2
																																		PDCD1			TREM1									CASP3	BCL2	TCL1
																																		TBX21			TREM2									CD99	BCL6	DUSP9
																																		TIGIT												EZH2	ATR	MYC
																																		ZAP70												IRF4	IRF4	TDGF1
																																		SLAMF7												LITAF	LDHB	EOMES
																																		CD96												MPEG1	MCM3AP	NANOG
																																		PVR												PRDX4	SETBP1	TERT
																																		STAT1												RHD	SPON1	ESRRB
																																		JAK1												SNX3	DUSP6	NCOR2
																																		JAK2												IGSF10	LDHA	TIGIT
																																		STAT2												SERPINB9	SOCS3	EVL
																																		IRF9												PRDM1	ZFX	NR0B1
																																		IGF2R												ANXA1	ABCB1A	TNFAIP2
																																		CD48												SIVA1	CXCR3	FAS
																																		ICOS												GZMB	EYA2	NR1D2
																																														LGALS1	ID3	TNFRSF1B
																																														ATPIF1	ABCB1B	FGF2
																																														CD48	TRIB2	P2RY14
																																														SUZ12	IRF8	TRAF1
																																														F2RL3	CCR9	FUT4
																																														TK1	NCOR2	PAX6
																																														LGALS3		TRAF4
																																														CBX1		GZMK
																																														VPS45		PCGF2
																																														LMNB1		TRIB2
																																														BIRC5		HAND1
																																														ANXA4		PLEKHA5
																																																TXNIP
																																																HESX1
																																																PODXL
																																																IER3
																																																POU5F1
																																																ZFP42
																																																IL2RB
																																																POU6F1
																																																ZFX
																																																IL7R
																																																PRKCE
																																																ZIC3
																																																IRF4
																																																REST
																																																IRF8
																																																RIF1
																																																JARID2
																																																RNF138
[truncated: 17 more columns]
