# Supplementary material for: Identification of novel myelodysplastic syndromes prognostic subgroups by integration of inflammation, cell-type composition, and immune signatures in the bone marrow
Source: eLife. 2024 Sep 5;13:RP97096. doi: 10.7554/eLife.97096 (PMC11377035; doi:10.7554/eLife.97096)
Supplement: Supplementary file 4. [file elife-97096-supp4.xlsx]

## Sheet: S4
EGAD00001003891 (BMMNC cohort)			GSE114922 (CD34+ chort)
Numeric Clinical Features	Categorical Clinical Features		Numeric Clinical Features	Categorical Clinical Features
Age	Sex		Age	Sex
Blast	Progression to AML		Hb	Transfusion dependency
Hb			WBC	Disease Subtype RARS
Anc			Neut	Disease Subtype RA
Plt			Platelet	Disease Subtype RAEB2
			Blast	Disease Subtype RAEB1
				Disease Subtype CMML
				IPSS Low
				IPSS Int-1
				IPSS Int-2
				IPSS High
