# Supplementary material for: Identification of novel myelodysplastic syndromes prognostic subgroups by integration of inflammation, cell-type composition, and immune signatures in the bone marrow
Source: eLife. 2024 Sep 5;13:RP97096. doi: 10.7554/eLife.97096 (PMC11377035; doi:10.7554/eLife.97096)
Supplement: Supplementary file 5. [file elife-97096-supp5.xlsx]

## Sheet: S5
	Univariable and multivariable Cox Proportional Hazards for HSPC cohort: Overall survival
	Overall survival
	Univariate		Multivariate
Factors	Hazard Ratio (CI)	p-value	Hazard Ratio (CI)	p-value
Factor1	0.70 (0.44-1.11)	0.129	0.82 (0.46-1.46)	0.496
Factor2	1.37 (0.90-2.09)	0.139	1.13 (0.69-1.85)	0.637
Factor3	1.04 (0.70-1.56)	0.836	0.96 (0.59-1.56, p=0.882)	0.882
Factor4	0.78 (0.55-1.11)	0.171	0.94 (0.63-1.42)	0.777
Factor5	0.78 (0.50-1.20)	0.251	0.74 (0.46-1.19)	0.218
Factor6	0.87 (0.56-1.37)	0.552	0.81 (0.47-1.40)	0.446
Factor7	0.60 (0.39-0.93)	0.022*	0.63 (0.36-1.11)	0.11
Factor8	0.86 (0.57-1.28)	0.454	0.90 (0.56-1.45)	0.657
Factor9	0.92 (0.60-1.42)	0.712	0.96 (0.56-1.65)	0.888
Factor10	0.82 (0.51-1.31)	0.4	0.86 (0.53-1.39)	0.536
